# Supplementary material for: Ethylene Oxide Monitor with Part-per-Trillion Precision for In-Situ Measurements
Source: Copernicus journal article supplement (doi:10.5194/amt-2022-294), 2022-11-03
Supplement: Supplementary file 2 [file amt-2022-294-supplement.pdf]

# Supplemental Information:

## Ethylene Oxide Monitor with Part-per-Trillion Precision for In-Situ Measurements

Tara I. Yacovitch, Christoph Dyroff, Joseph R. Roscioli, Conner Daube, J. Barry McManus, Scott C. Herndon

Aerodyne Research, Inc. Billerica MA, 01821 USA

Correspondence to: Tara I. Yacovitch (tyacovitch@aerodyne.com)

### Table of Contents

|    |                                                               |    |
|----|---------------------------------------------------------------|----|
|    | Table of Contents.....                                        | 1  |
| 10 | S1 Instrument.....                                            | 2  |
|    | S1.1 Optical setup of single-laser dual with 413 m cell ..... | 2  |
|    | S1.2 Flow system.....                                         | 3  |
|    | S2 Calibration .....                                          | 4  |
|    | S3 Ambient Measurements.....                                  | 6  |
| 15 | S3.1 Statistics for Ambient Measurements.....                 | 6  |
|    | S3.2 Hysplit Back Trajectories .....                          | 8  |
|    | S4. Mobile Measurements .....                                 | 10 |
|    | S4.1 Facility A measurements .....                            | 10 |
|    | S4.2 Facility B Measurements.....                             | 12 |
| 20 | References.....                                               | 13 |

## S1 Instrument

### S1.1 Optical setup of single-laser dual with 413 m cell

The basis of our EtO monitor is our commercially available (Aerodyne Research Inc., 2022a, b) dual-laser tunable infrared  
25 direct absorption spectrometer (TILDAS-FD) platform, which in this case is equipped with a single mid-infrared interband-  
cascade laser (nanoplus GmbH). The highly divergent beam of this laser is collected and focused into a long-pathlength  
multipass cell using a sequence of reflective optics (Mcmanus et al., 2015). A visible laser is co-aligned using a dichroic mirror  
to aid the optical alignment of the system.

For the system described herein, we use a multipass cell with 413 m optical pathlength and an active volume of 1.8 litres for  
30 continuous flow applications. The cell contains two mirrors with wavelength-specific high-reflectivity coating (reflectivity  
>99.8%) to minimize reflective losses of laser power during the > 800 reflections among the two mirrors. Upon exiting the  
cell, the laser beam is focused on a thermoelectrically cooled photovoltaic HgCdTe detector (Judson, J19 with transimpedance  
amplifier).

The laser is driven by electrical current while being maintained at a constant temperature. The in-house software TDLWintel  
35 provides a voltage ramp via a digital-to-analogue converter card (National Instruments). This ramp is translated into current  
via a low-noise laser driver (QCL-500, Wavelength Electronics). The laser temperature is maintained by an electronic  
temperature controller via the built-in thermoelectric element in the sealed laser housing. The detector signal is digitized using  
an analogue-to-digital convert card (National Instruments) and then handled by TDLWintel for processing.

The laser wavelength is scanned across a narrow wavelength interval near 3065 cm<sup>-1</sup> approximately 1830 times per second.  
40 For every scan, the laser is on for the first 90% of the time, followed by a brief period where it is off for the remaining 10% of  
the time. The individual spectra are then averaged to a single spectrum every 1 second. This averaged spectrum is then  
processed in TDLWintel to derive the mixing ratio of EtO as well as of all other absorbers defined in the spectroscopic fit at 1  
Hz in real time.

Spectra are defined by absorption signal, a polynomial spectral baseline (full light, no absorption), as well as signal during the  
45 off period (no light, complete absorption). The latter two components are used to normalize the measured spectra onto the  
transmission scale (0 – 1).

The wavelength scale of the laser scan is determined by periodically analysing the interference spectrum of a Germanium  
etalon. The derived wavelength scale is then further refined measuring a high-concentration ethylene (C<sub>2</sub>H<sub>4</sub>) spectrum from a  
reference cell built into an optional beam path in the spectrometer optics. Wavelength drift is mitigated by locking the laser to  
50 a strong H<sub>2</sub>O line in the sample spectrum using an active feedback loop controller realized in software.

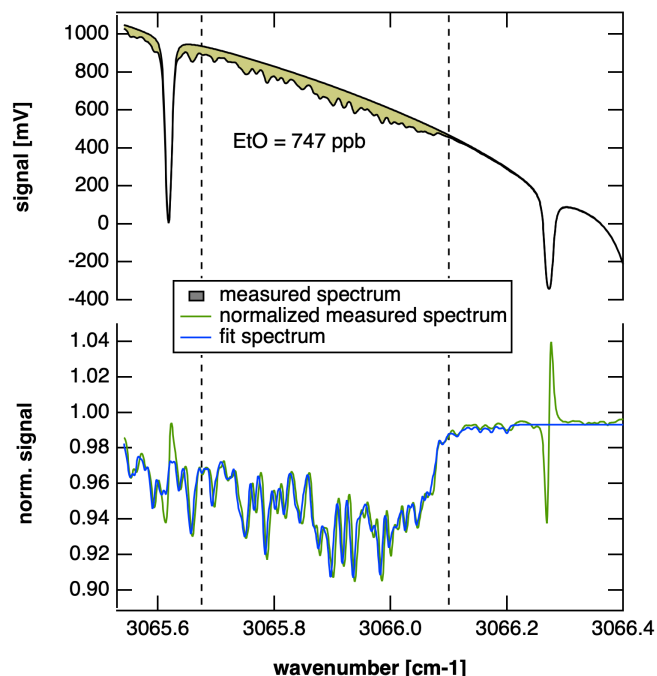

**Figure S1. Summary spectrum for instantaneous Facility A measurement of 747 ppb. The top shows signal as a function of wavenumber, with EtO contributions highlighted in yellow. The bottom shows normalized measured (green) and fit (blue) spectrum.**

## S1.2 Flow system

55 Sample gas is drawn through the multipass cell at a reduced pressure of 20 Torr (27 hPa) using a vacuum pump downstream of the instrument and an upstream pressure controller. This reduced pressure is used to sharpen the absorption lines in the spectrum and provide the best compromise of spectroscopic selectivity and sensitivity. The gas-flow rate is typically around 3 – 5 slpm (slpm: standard litres per minute), resulting in a gas exchange rate of 1 Hz or better.

An overblow port is set up to deliver calibration gas or ultra-zero air. To prevent pressure disruptions, this port is tied into the inlet ~6 inches from the tip using a union tee. For humidity-matched zeroes, a parallel flow path is set up, with a length-matched piece of tubing and scrubber cartridge isolated by two solenoid valves. These valves actuate at the same time, pulling ambient air through the scrubber and providing near-humidity-matched zero air free of EtO.

Spectral backgrounding (or autobackgrounding) is done by intermittently and regularly measuring air free of EtO. A background spectrum is acquired and used to divide subsequent sample spectra, reducing the impact of drift due to instrumental effects like optical fringes and spectral baseline effects. Each background takes about 1 minute at 3 - 5 SLPM in order to flush out the cell, acquire clean spectra, and return to sampling.

S2 Calibration

The EtO-TILDAS instruments reports dry air mixing ratios that have been mathematically corrected for the dilution effects of water vapor, as well as for empirical water broadening effects. At the ambient humidity measured, these effects are expected to be < 3%.

In a typical calibration, 50-500 sccm of an EtO standard at 1 ppm EtO is delivered via an Alicat mass flow controller to a ½” overblow line connected via a T-fitting 6 inches from the inlet tip. Calibrations are done either by standard addition to humid ambient air, with a known total inlet flow rate (3 – 10 SLPM) or via dilution into a known flow (3-10 SLPM) of ultra-zero air delivered by a second Alicat mass flow controller. Humid standard additions are preferred, as they most closely resemble sampling conditions.

Standard concentrations were calculated based on the known calibration tank concentrations and the known system flows. Calibration factors (m) consist of the slope of a linear plot of measured EtO vs standard EtO, where  $\text{true\_conc} = m * \text{meas\_conc}$ ; when applying these calibration factors, divide the raw reported EtO by the slope. Two example calibration curves are shown below. Note that during dry calibrations in UZA, the EtO intercept is fixed to 0; during standard additions it is floated to account for potential ppt-level background concentrations. Example calibration curves for a dry (left) and humid (right) calibration are shown below. The 2021 Airgas calibration tank used in these results is shown in Figure S3

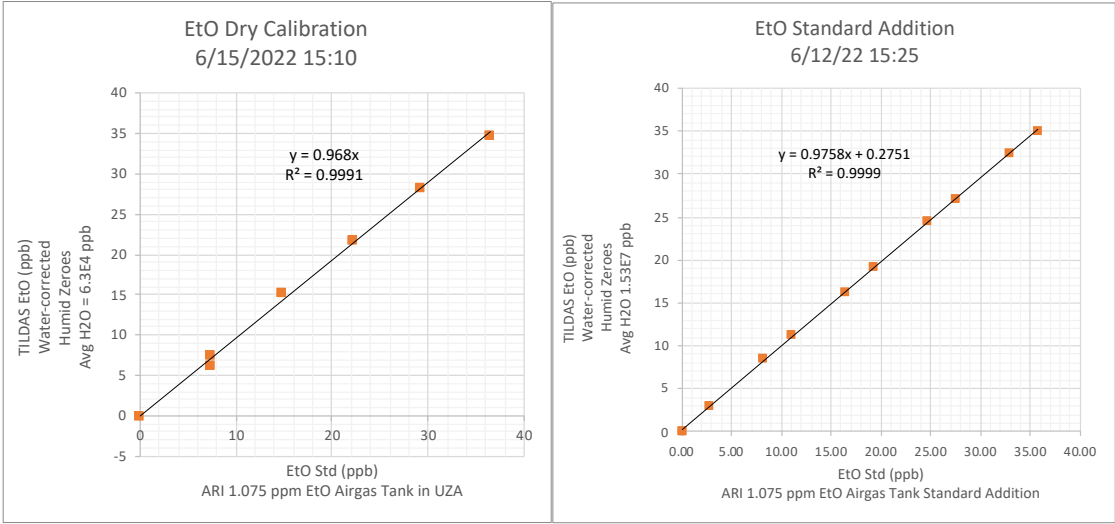

Figure S2. Example standard addition and dry dilution calibrations for EtO.

**CERTIFICATE OF ANALYSIS**  
**Grade of Product: CERTIFIED STANDARD-SPEC**

|                  |                           |                    |                 |
|------------------|---------------------------|--------------------|-----------------|
| Part Number:     | X03NI99C15A05D3           | Reference Number:  | 160-401988504-1 |
| Cylinder Number: | CC68617                   | Cylinder Volume:   | 144.3 CF        |
| Laboratory:      | 124 - Plumsteadville - PA | Cylinder Pressure: | 2015 PSIG       |
| Analysis Date:   | Dec 31, 2020              | Valve Outlet:      | 350SS           |
| Lot Number:      | 160-401988504-1           |                    |                 |

Product composition verified by direct comparison to calibration standards traceable to N.I.S.T. weights and/or N.I.S.T. Gas Mixture reference materials.

**ANALYTICAL RESULTS**

| Component      | Req Conc  | Actual Concentration<br>(Mole %) | Analytical<br>Uncertainty |
|----------------|-----------|----------------------------------|---------------------------|
| ETHANE         | 1.000 PPM | 1.075 PPM                        | +/- 5%                    |
| ETHYLENE OXIDE | 1.000 PPM | 1.092 PPM                        | +/- 5%                    |
| NITROGEN       | Balance   |                                  |                           |

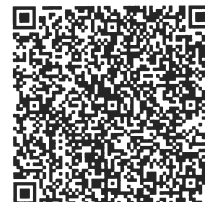

  
Approved for Release

**Figure S3. Airgas calibration tank containing ethane and ethylene oxide at 1 ppm.**

**Table S1. Summary calibration factors for humid vs dry calibrations of ARI’s Airgas tank X03NI99C15A05D3 over a week-long period**

| Statistics                      | Humid<br>Standard<br>Additions | Dry<br>Calibrations |
|---------------------------------|--------------------------------|---------------------|
| Average                         | 0.981                          | 0.999*              |
| StdDev                          | 0.014                          | 0.021               |
| 95% error                       | 0.045                          | 0.068               |
| % error                         | 4.6%                           | 6.8%                |
| 1 ppb EtO would be corrected to | 1.020                          | 1.001               |

90 **Table S2. Summary calibration factors for all calibrations of ARI’s Airgas tank X03NI99C15A05D3 (both humid and dry) over a week-long period**

| Statistics                      | Average all<br>ARI Tank |
|---------------------------------|-------------------------|
| Average                         | 0.979                   |
| StdDev                          | 0.037                   |
| Count                           | 9                       |
| 95% error                       | 0.084                   |
| % error                         | 8.6%                    |
| 1 ppb EtO would be corrected to | 1.021                   |
| Certified Tank Conc (ppm)       | 1.092 ± 5%              |
| Measured Tank Conc (ppm)        | 1.069 ± 8.6%            |

**S3 Ambient Measurements**

**S3.1 Statistics for Ambient Measurements**

95 Averages of the full time series, and of winter/spring (Feb 2022 – April 30 2022) and summer (July 1, 2022 – Aug 4, 2022) averages of the 1hr data shown in Figure 3 of the Manuscript are listed in Table S3 below. To understand whether the Winter/Spring and summer averages are significantly different, we compute the standard error of the mean (SEM), where SEM = SD/sqrt(N). We also include and propagate through a 5% error due to calibration uncertainty, yielding propagated error bars of 1-2 ppt for the averages. The upper and lower confidence limits at 95% confidence (UL and LL) are listed for winter/spring

100 and summer averages. The winter UL of 14 ppt does not overlap the summer LL of 31 ppt, leading us to conclude, using these Gaussian statistics, that the averages are significantly different at the 95% confidence level.

Since these statistics do include the small number of plumes observed, we also show histograms and Gaussian fits of the data in Figure S4. The Gaussian peaks occur at 12 ppt for the winter/spring and 32 ppt for summer, comparing well to the full averages computed in Table S3 of 12 ppt and 33 ppt, respectively, and do not alter the conclusions.

105

**Table S3. Averages and statistics for 1hr ambient data shown in Figure 3 of the Manuscript, all values in ppb. “Winter/Spring” spans from February to April 30, 2022. “Summer” spans July to August 4, 2022. The standard Deviation (SD), number of 1hr averages (N), Student’s T statistic at 95% confidence (t), 95% error bars using the SD are listed. Additional statistics for the mean are included: the standard error of the mean (SEM), 95% error bars for the average using the SEM, estimated error bars assuming a 5% calibration uncertainty, the resulting propagated error, and the resulting 95% Lower Limit (LL) and Upper Limit (UL) for winter and summer averages.**

110

|                                                                                                             | Avg   | SD        | N    | t,<br>95%<br>Conf | 95%<br>Error<br>using<br>SD | SEM    | 95%<br>error<br>from<br>SEM | Error<br>5%<br>Cal.<br>Uncert | Prop-<br>agated<br>error | LL    | UL    |
|-------------------------------------------------------------------------------------------------------------|-------|-----------|------|-------------------|-----------------------------|--------|-----------------------------|-------------------------------|--------------------------|-------|-------|
| <b>All Data<br/>shown in<br/>Manuscript<br/>Figure 3<br/>Error!<br/>Reference<br/>source not<br/>found.</b> | 0.018 | 0.02<br>2 | 2610 | 1.961             | 0.043                       | 0.0004 | 0.0008                      | 0.001                         | 0.001                    | 0.017 | 0.020 |
| <b>Winter/<br/>Spring<br/>(ending<br/>April 30)</b>                                                         | 0.012 | 0.02<br>3 | 1613 | 1.961             | 0.044                       | 0.0006 | 0.0011                      | 0.001                         | 0.001                    | 0.011 | 0.014 |
| <b>Summer</b>                                                                                               | 0.033 | 0.01<br>3 | 485  | 1.965             | 0.026                       | 0.0006 | 0.0012                      | 0.002                         | 0.002                    | 0.031 | 0.035 |

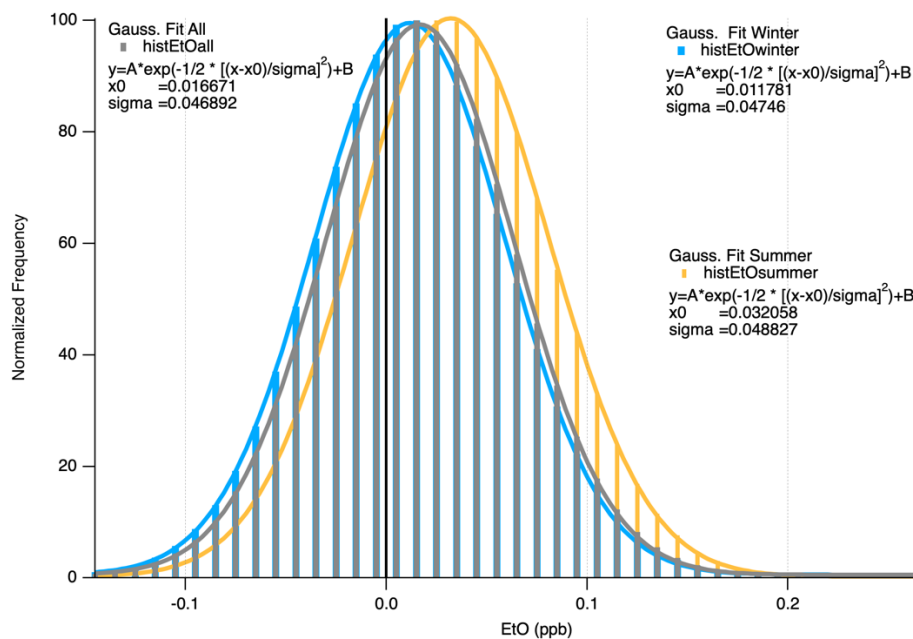

Figure S4. Histogram of 1hr average data in winter/spring (blue), summer (yellow) and all ambient measurements (grey).

## 115 S3.2 Hysplit Back Trajectories

The back trajectory analysis was computed using the National Oceanic and Atmospheric Administration (NOAA) Air Resources Laboratory (ARL) Hybrid Single-Particle Lagrangian Integrated Trajectory model (HYSPLIT). The work depicted here in the SI used the web-based model with default options. The parameters for the run are noted in the figure legend. This work involved straightforward back trajectory calculation. Although HYSPLIT is capable of a rigorous source-receptor analysis, the physical correspondence noted below has been performed ‘by eye’, not via a quantitative attribution. Details of the NOAA/ARL HYSPLIT model (Rolph et al., 2017; Stein et al., 2015) can be found in the cited sources or at the primary website (<https://www.arl.noaa.gov/hysplit/>).



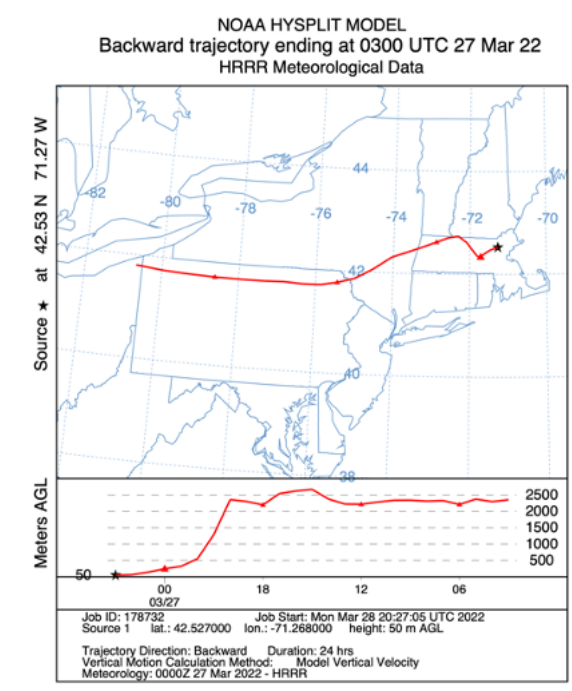

Figure S5. Back trajectory simulation for the EtO event on 3/27/2022. (NOAA Air Resources Laboratory)

125

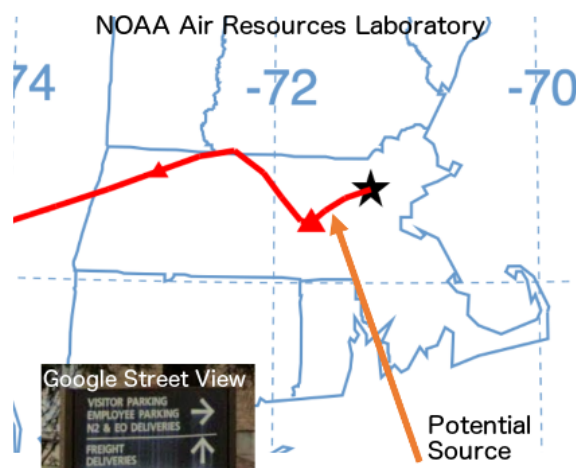

Figure S6. Detail of back trajectory (NOAA Air Resources Laboratory). The orange arrow indicates location of one potential EtO source in the state. A roadside-view of this facility's signage is inset (© Google Street View), with "EO deliveries" noted.

130

S4. Mobile Measurements

S4.1 Facility A measurements

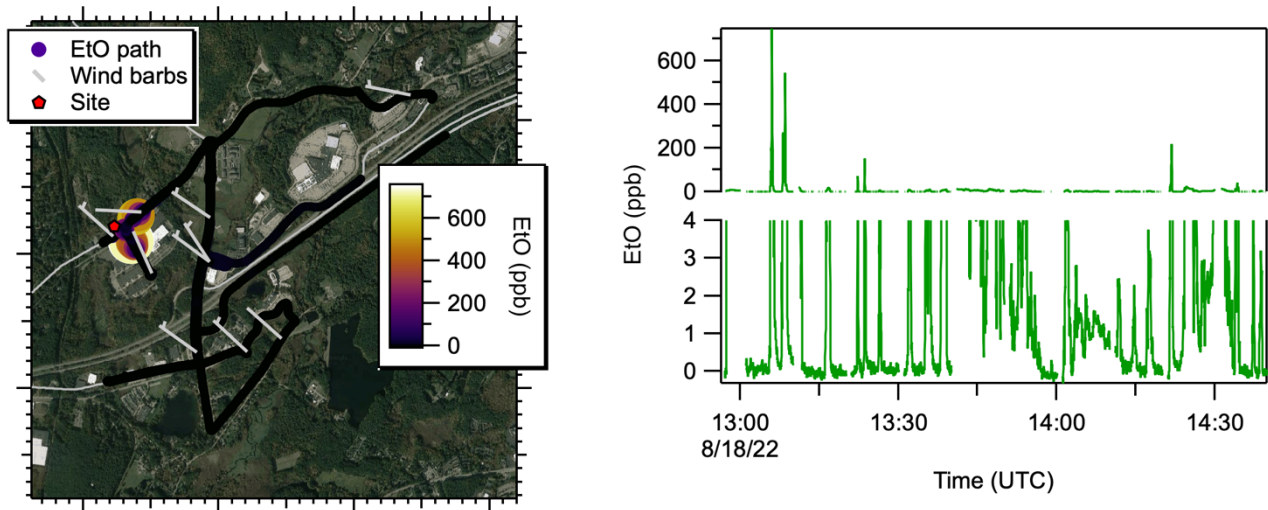

135 Figure S7. Morning summary data downwind of Facility A. A map (left) shows AML path colored by EtO concentration, with wind barbs pointing into the wind. Time series show EtO concentrations zoomed to 0-4 ppb (bottom right) and at full scale (top right). Map underlay: Google, © 2022 CNES / Airbus, Landsat / Copernicus, MassGIS, Commonwealth of Massachusetts EOE, Maxar Technologies, USDA/FPAC/GEO

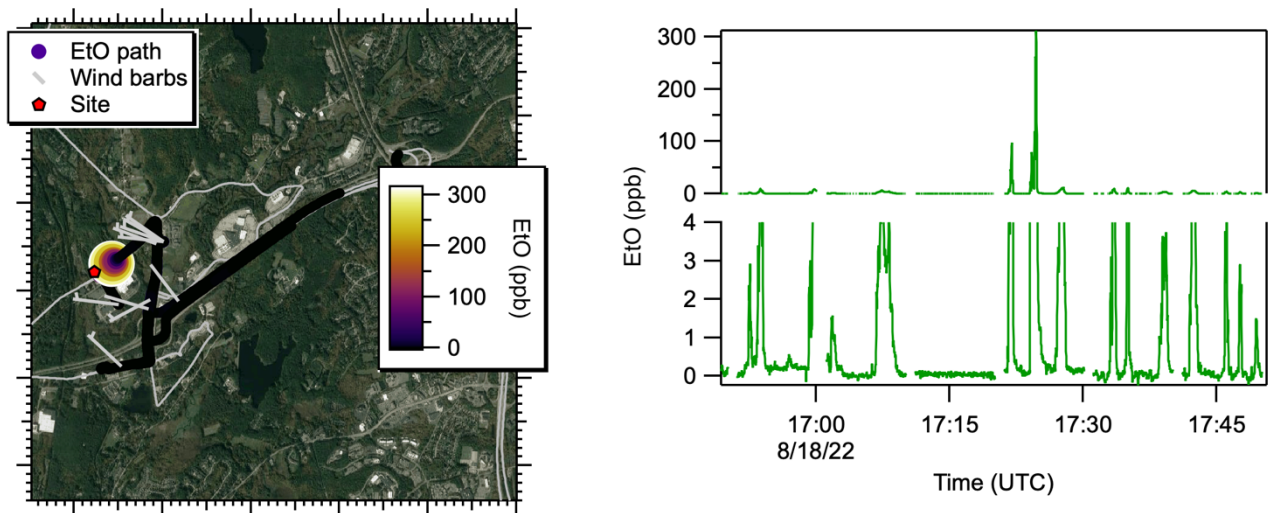

140 Figure S8. Afternoon Summary data downwind of Facility A. A map (left) shows AML path colored by EtO concentration, with wind barbs pointing into the wind. Time series show EtO concentrations zoomed to 0-4 ppb (bottom right) and at full scale (top right). Map underlay: Google, © 2022 CNES / Airbus, Landsat / Copernicus, MassGIS, Commonwealth of Massachusetts EOE, Maxar Technologies, USDA/FPAC/GEO

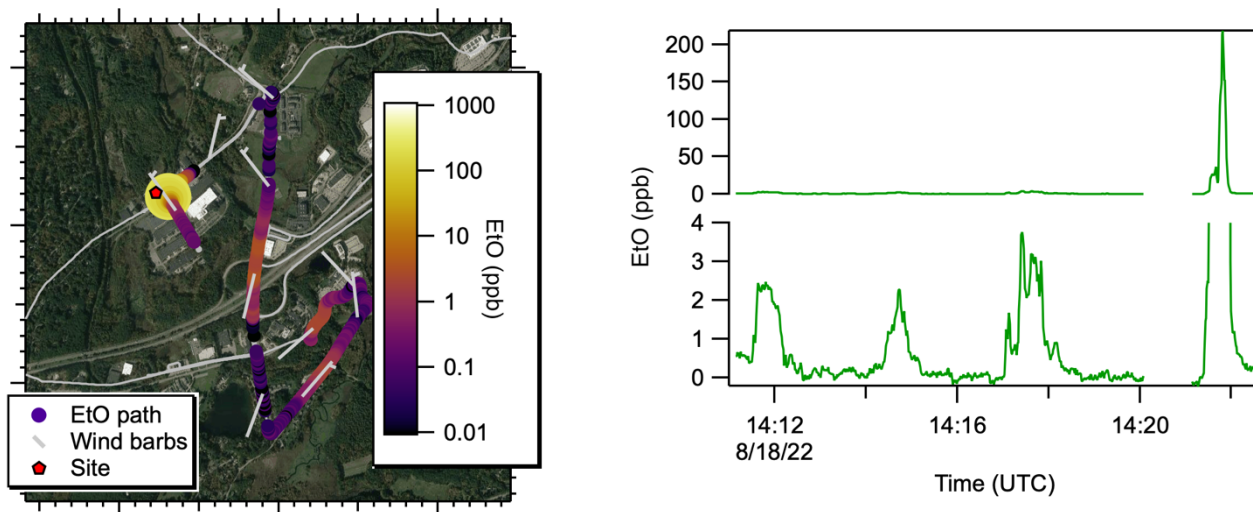

145 **Figure S9. Detail of Morning Transect Downwind of Facility A.** A map (left) shows AML path colored by EtO concentration (log scale), with wind barbs pointing into the wind. Time series show EtO concentrations zoomed to 0-4 ppb (bottom right) and at full scale (top right). Map underlay: Google, © 2022 CNES / Airbus, Landsat / Copernicus, MassGIS, Commonwealth of Massachusetts EOE, Maxar Technologies, USDA/FPAC/GEO

Spatial averaging was done for all data collected on 8/18/2022 at Facility A. Bins are 100m x 100m in size.

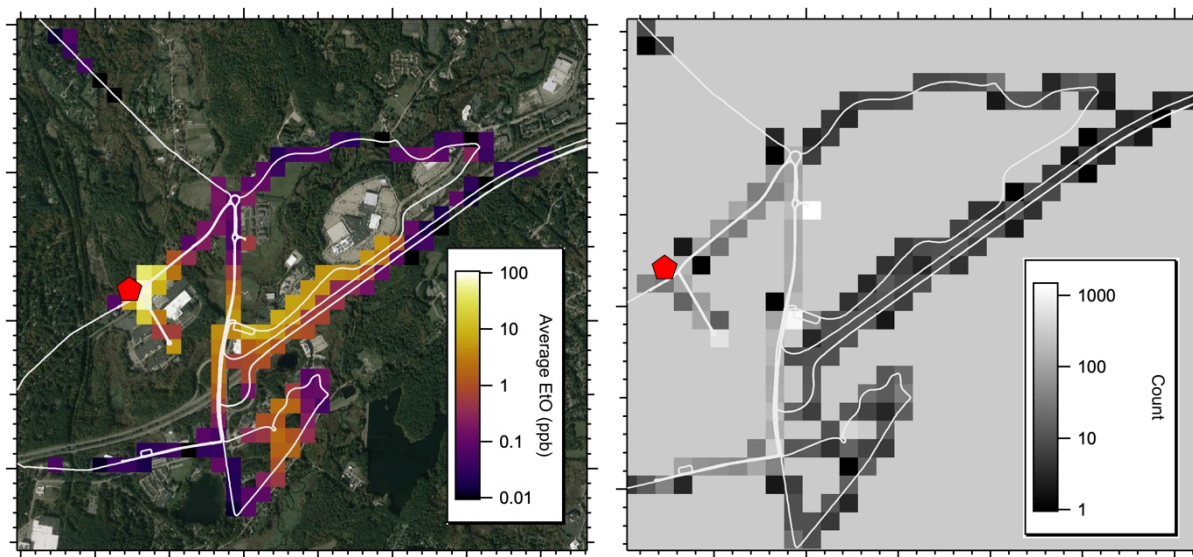

150 **Figure S10. Binned average EtO concentrations (log scale) downwind of Facility A (left) along with data point count (right).** The facility is located at the red marker. Wind was consistently from the North-West during these measurements. Map underlay: Google, © 2022 CNES / Airbus, Landsat / Copernicus, MassGIS, Commonwealth of Massachusetts EOE, Maxar Technologies, USDA/FPAC/GEO

155

S4.2 Facility B Measurements

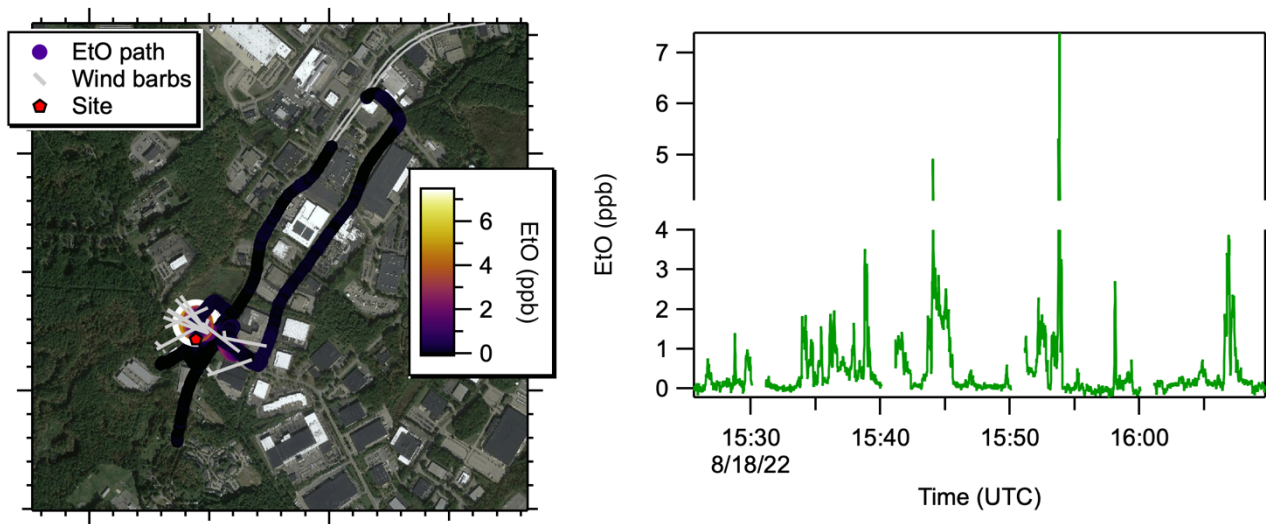

160 Figure S11. Full Summary time series downwind of Facility B. A map (left) shows AML path colored by EtO concentration, with wind barbs pointing into the wind. Time series show EtO concentrations zoomed to 0-4 ppb (bottom right) and at full scale (top right). Map underlay: Google, © 2022 CNES / Airbus, Landsat / Copernicus, MassGIS, Commonwealth of Massachusetts EOE, Maxar Technologies, RIGIS, USDA/FPAC/GEO

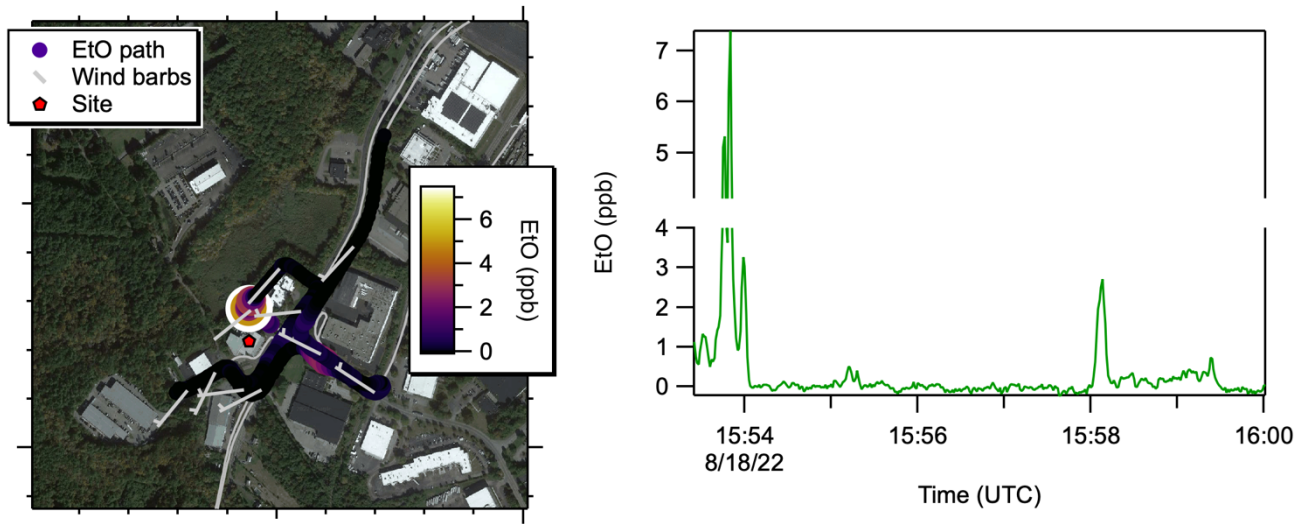

165 Figure S12. Detail of time series downwind of Facility B. A map (left) shows AML path colored by EtO concentration, with wind barbs pointing into the wind. Time series show EtO concentrations zoomed to 0-4 ppb (bottom right) and at full scale (top right). Map underlay: Google, © 2022 CNES / Airbus, MassGIS, Commonwealth of Massachusetts EOE, Maxar Technologies, RIGIS, USDA/FPAC/GEO



Spatial averaging was done for all data collected on 8/18/2022 at Facility B. Bins are 100m x 100m in size.

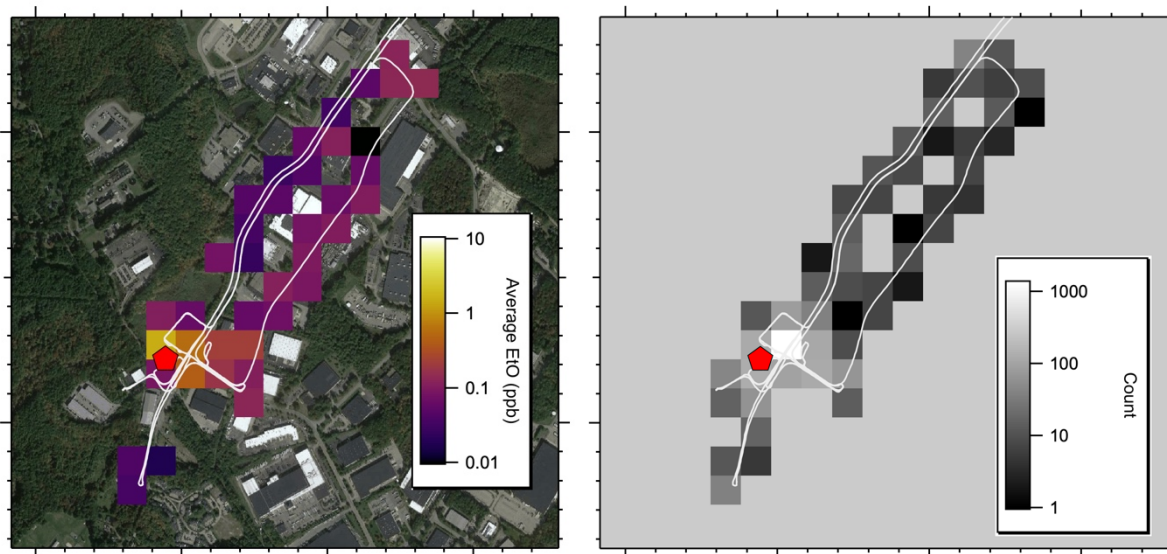

170 **Figure S13. Binned average EtO concentrations downwind of Facility B (left) along with data point count (right). The facility is located at the red marker. Wind was from the West during these measurements. Map underlay: Google, © 2022 CNES / Airbus, MassGIS, Commonwealth of Massachusetts EOE, Maxar Technologies, RIGIS, USDA/FPAC/GEO**

## References

- 175 Aerodyne Research Inc.: Laser trace gas and isotope analyzers, 2022a. <https://www.aerodyne.com/product/laser-trace-gas-and-isotope-analyzers/>, last
- Aerodyne Research Inc.: TILDAS compact single laser ethylene oxide analyzer, 2022b. <https://www.aerodyne.com/wp-content/uploads/2022/01/EthyleneOxide.pdf>, last
- McManus, J. B., Zahniser, M. S., Nelson, D. D., Shorter, J. H., Herndon, S. C., Jervis, D., Agnese, M., McGovern, R.,  
 180 Yacovitch, T. I., and Roscioli, J. R.: Recent progress in laser-based trace gas instruments: Performance and noise analysis, *Applied Physics B*, 119, 203-218, 10.1007/s00340-015-6033-0, 2015.
- Rolph, G., Stein, A., and Stunder, B.: Real-time environmental applications and display system: Ready, *Environmental Modelling & Software*, 95, 210-228, <https://doi.org/10.1016/j.envsoft.2017.06.025>, 2017.
- Stein, A. F., Draxler, R. R., Rolph, G. D., Stunder, B. J. B., Cohen, M. D., and Ngan, F.: NOAA's HYSPLIT atmospheric  
 185 transport and dispersion modeling system, *Bulletin of the American Meteorological Society*, 96, 2059-2077, 10.1175/bams-d-14-00110.1, 2015.
